# Supplementary material
Source: PubMed Central journal article supplement (PMC7180064)
Supplement: NIHMS1579162-supplement-Supplement1.pdf [file NIHMS1579162-supplement-Supplement1.pdf]

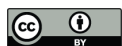

*Supplement of*

**Modeling stratospheric intrusion and trans-Pacific transport on tropospheric ozone using hemispheric CMAQ during April 2010 – Part 2: Examination of emission impacts based on the higher-order decoupled direct method**

Syuichi Itahashi et al.

*Correspondence to:* Syuichi Itahashi ([isyuichi@criepi.denken.or.jp](mailto:isyuichi@criepi.denken.or.jp))

The copyright of individual parts of the supplement might differ from the CC BY 4.0 License.

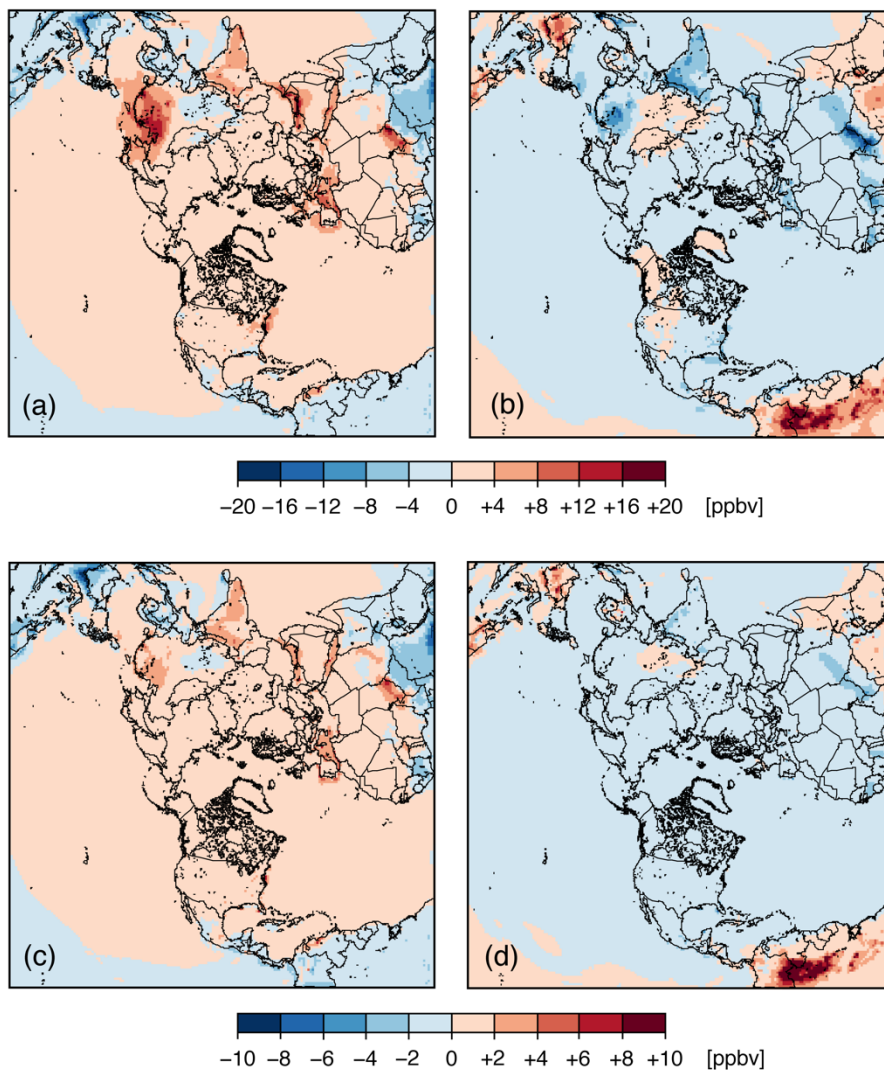

**Figure S1. (Top) spatial distribution of the sensitivity coefficients of  $O_3$  to (a) domain-wide VOC emissions as first-order, (b) same as (a) but as second-order during April 2010 (same figure with Fig. 1 (b) and (c)). (Bottom) spatial distribution of the sensitivity coefficients of  $O_3$  to (c) domain-wide isoprene emissions as first-order, (d) same as (c) but as second-order during April 2010. Note the color scale is half of top panel.**

Sensitivity coefficient of O<sub>3</sub> to emissions from U.S.A.

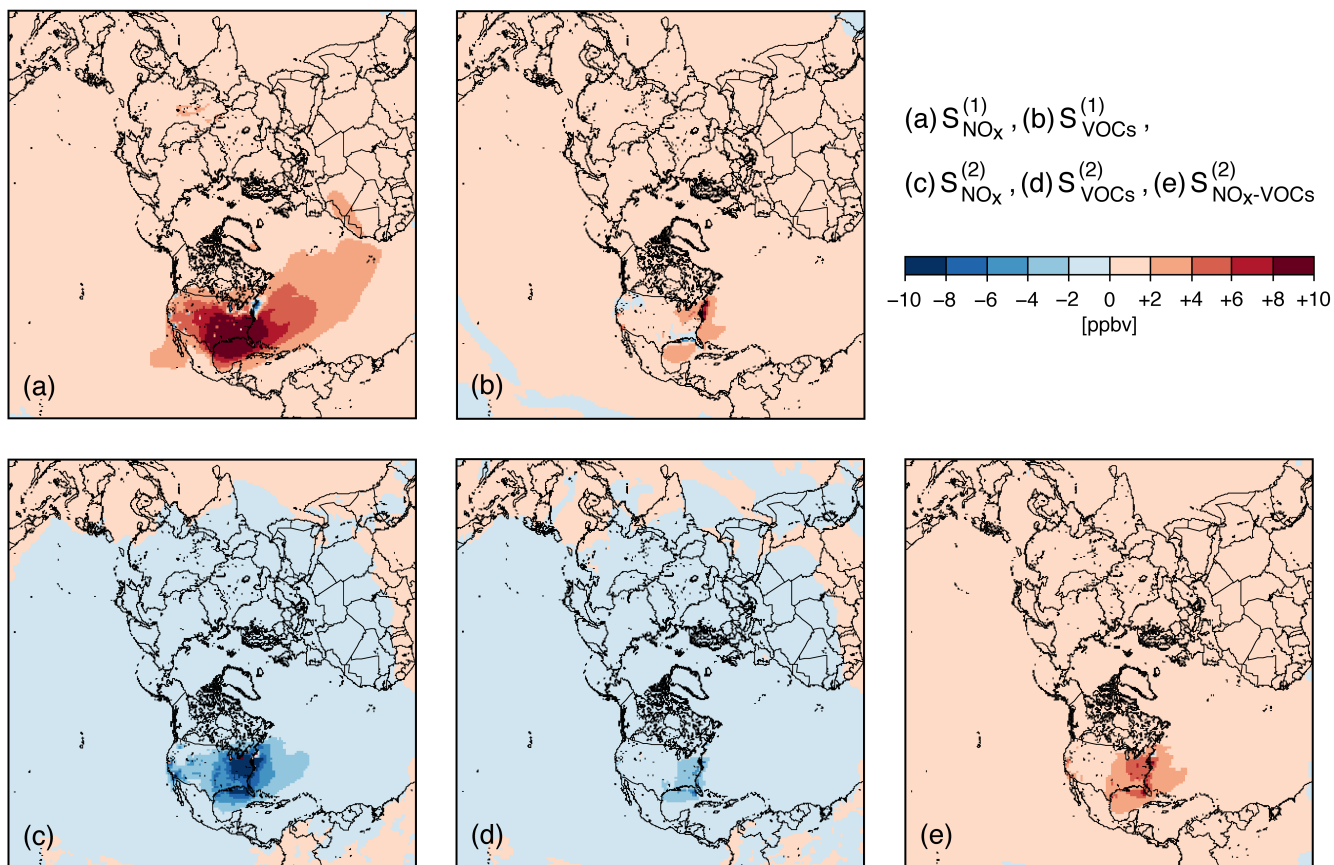

Figure S2. Spatial distribution of the sensitivity coefficients of O<sub>3</sub> to (a) NO<sub>x</sub> emissions from U.S.A as first-order, (b) VOC emissions from U.S.A as first-order, (c) same as (a) but as second-order, (d) same as (b) but as second-order, and (e) NO<sub>x</sub> and VOC emissions from U.S.A. during April 2010.

### Sensitivity coefficient of O<sub>3</sub> to emissions from East Asia

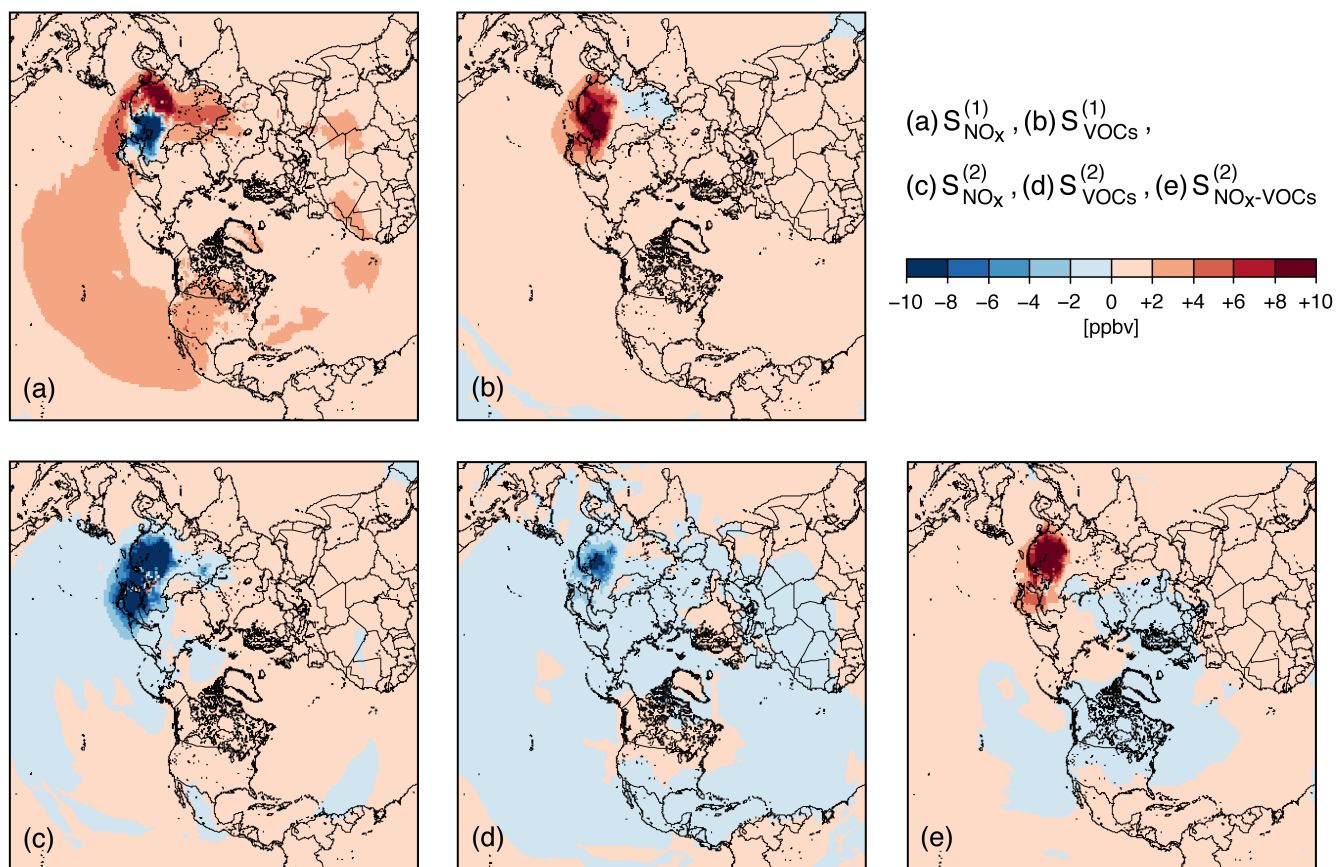

Figure S3. Spatial distribution of the sensitivity coefficients of O<sub>3</sub> to (a) NO<sub>x</sub> emissions from East Asia as first-order, (b) VOC emissions from East Asia as first-order, (c) same as (a) but as second-order, (d) same as (b) but as second-order, and (e) NO<sub>x</sub> and VOC emissions from East Asia during April 2010.

### Sensitivity coefficient of O<sub>3</sub> to emissions from other regions

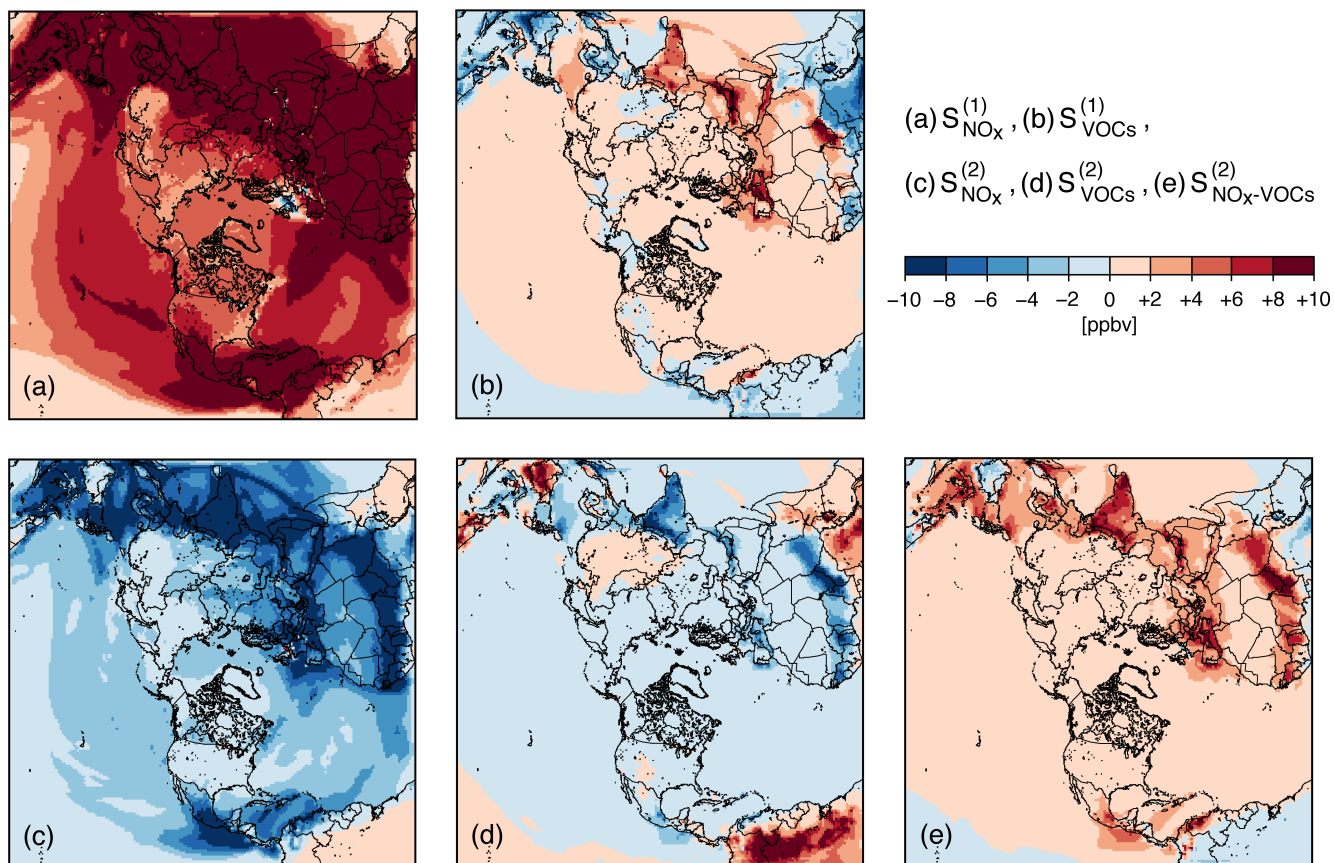

**Figure S4.** Spatial distribution of the sensitivity coefficients of O<sub>3</sub> to (a) NO<sub>x</sub> emissions from East Asia as first-order, (b) VOC emissions from East Asia as first-order, (c) same as (a) but as second-order, (d) same as (b) but as second-order, and (e) NO<sub>x</sub> and VOC emissions from other regions except U.S.A. (shown in Fig. S2) and East Asia (shown in Fig. S3) during April 2010.

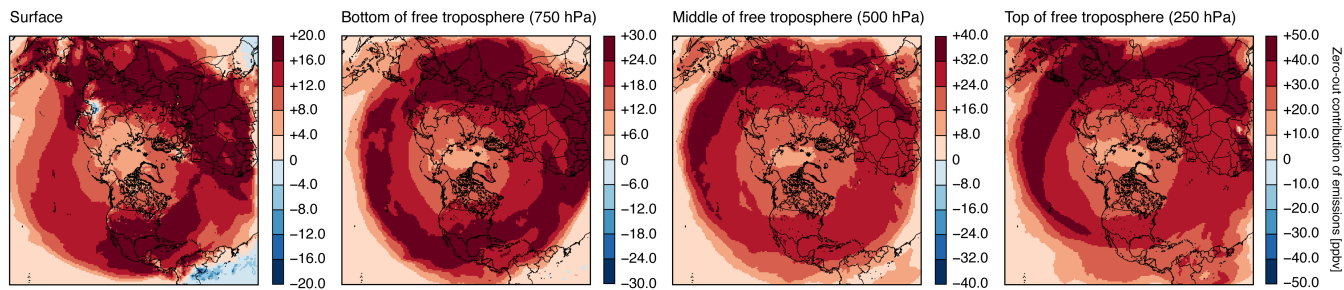

**Figure S5. Monthly averaged zero-out contribution from domain-wide emissions at surface, bottom of free troposphere (750 hPa), middle of free troposphere (500 hPa), and top of free troposphere (250 hPa) from left to right.**

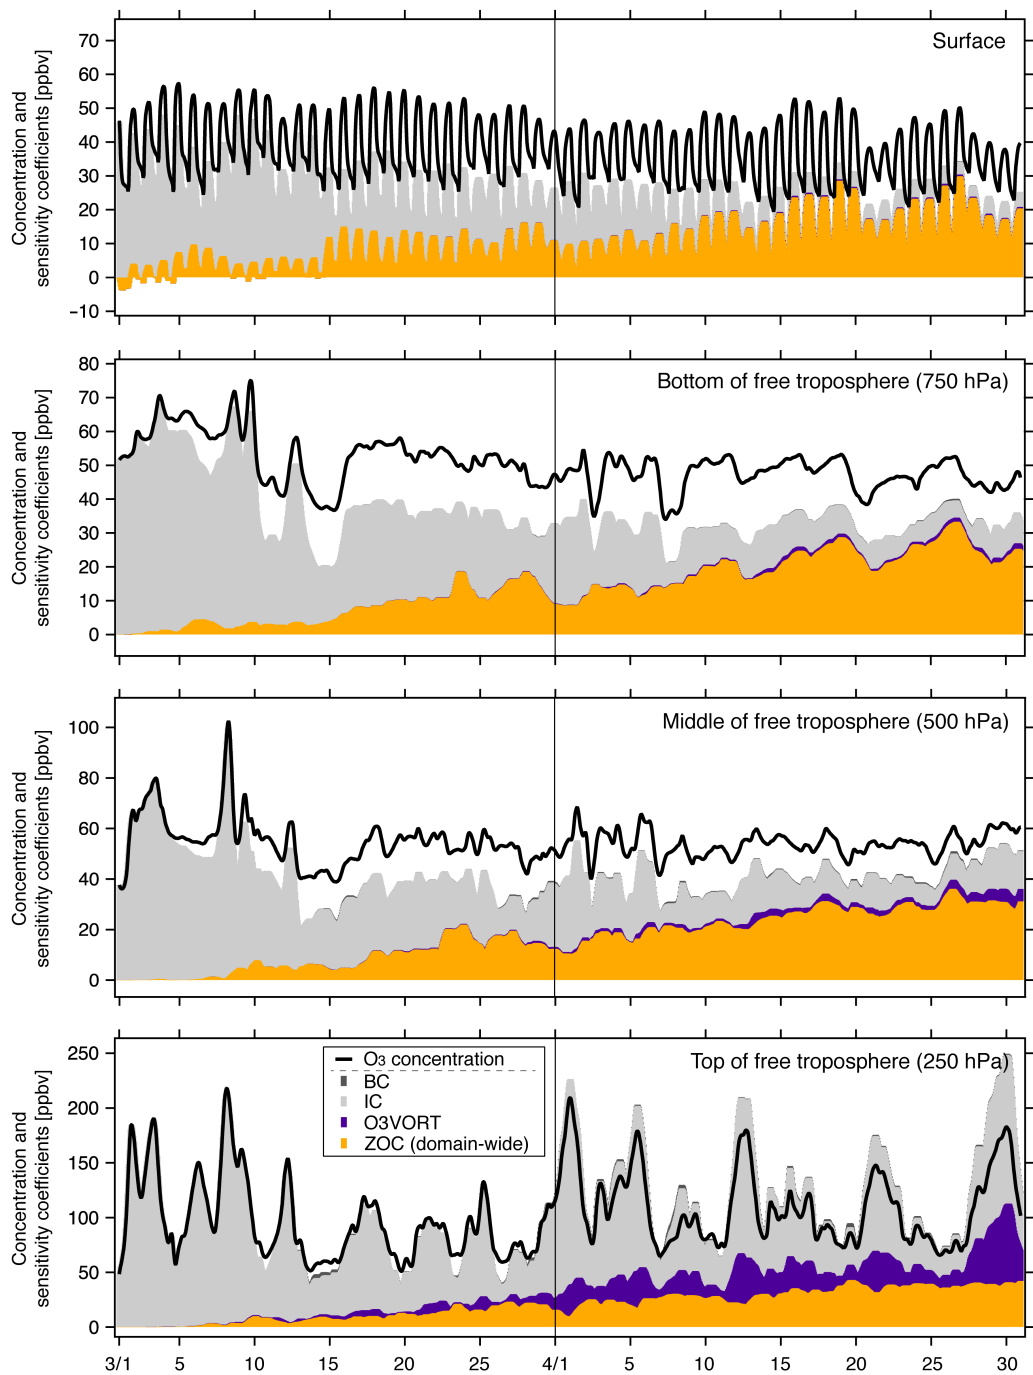

**Figure S6. Temporal variation of O<sub>3</sub> concentration and sensitivities O<sub>3</sub> to boundary condition (BC), initial condition (IC), stratospheric O<sub>3</sub> (O3VORT), and emissions (shown as ZOC, see, eq. (5)) over PST in the U.S.A.**

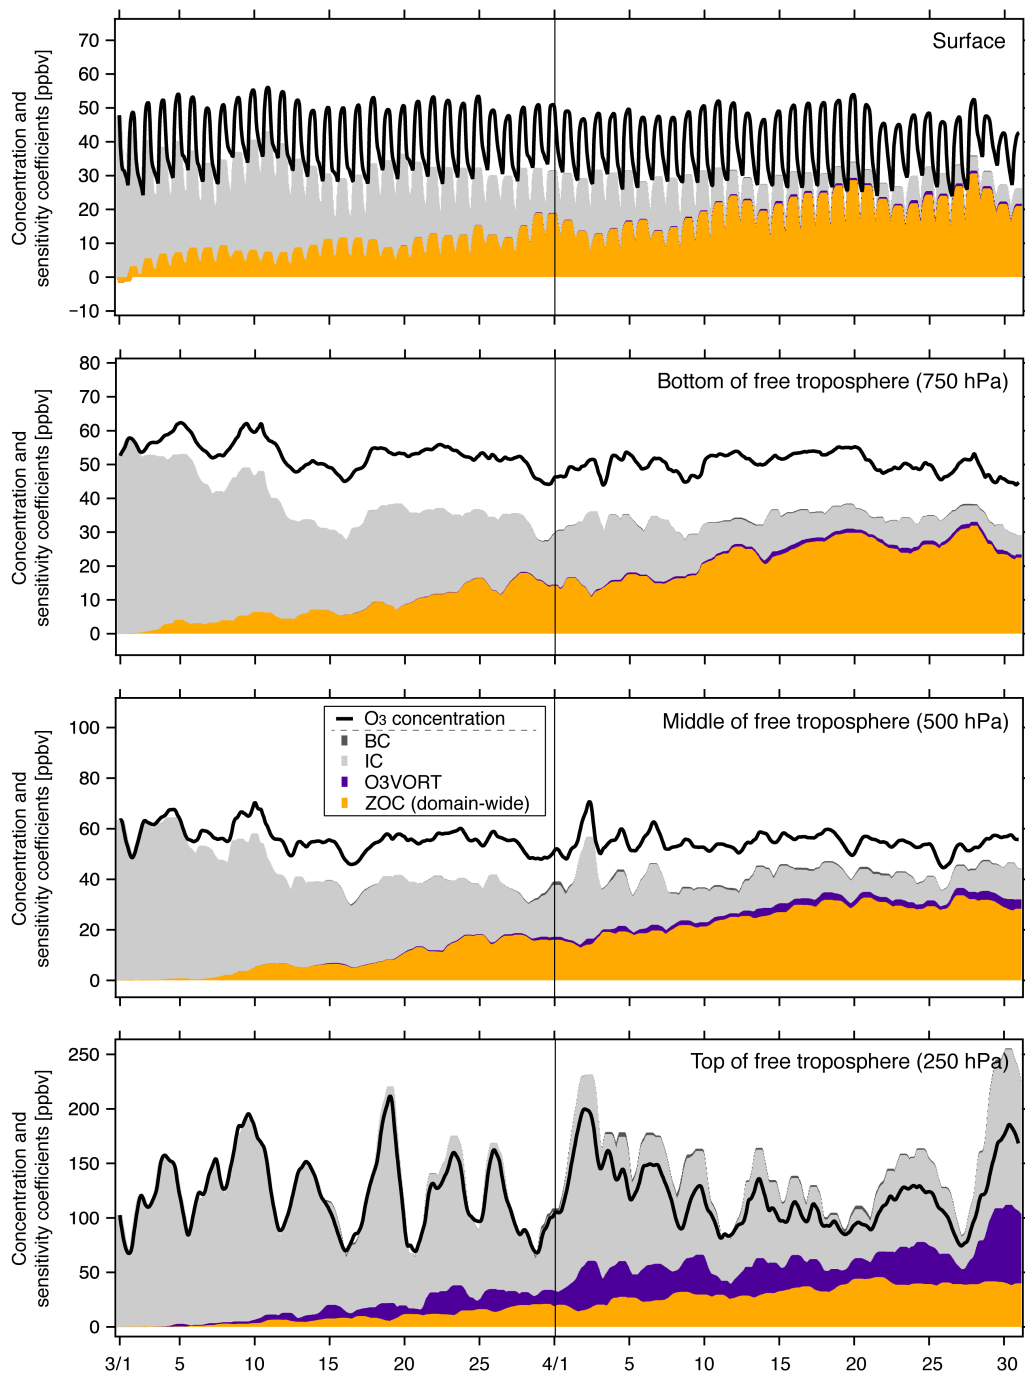

**Figure S7. Temporal variation of O<sub>3</sub> concentration and sensitivities O<sub>3</sub> to boundary condition (BC), initial condition (IC), stratospheric O<sub>3</sub> (O3VORT), and emissions (shown as ZOC, see, eq. (5)) over MST in the U.S.A.**



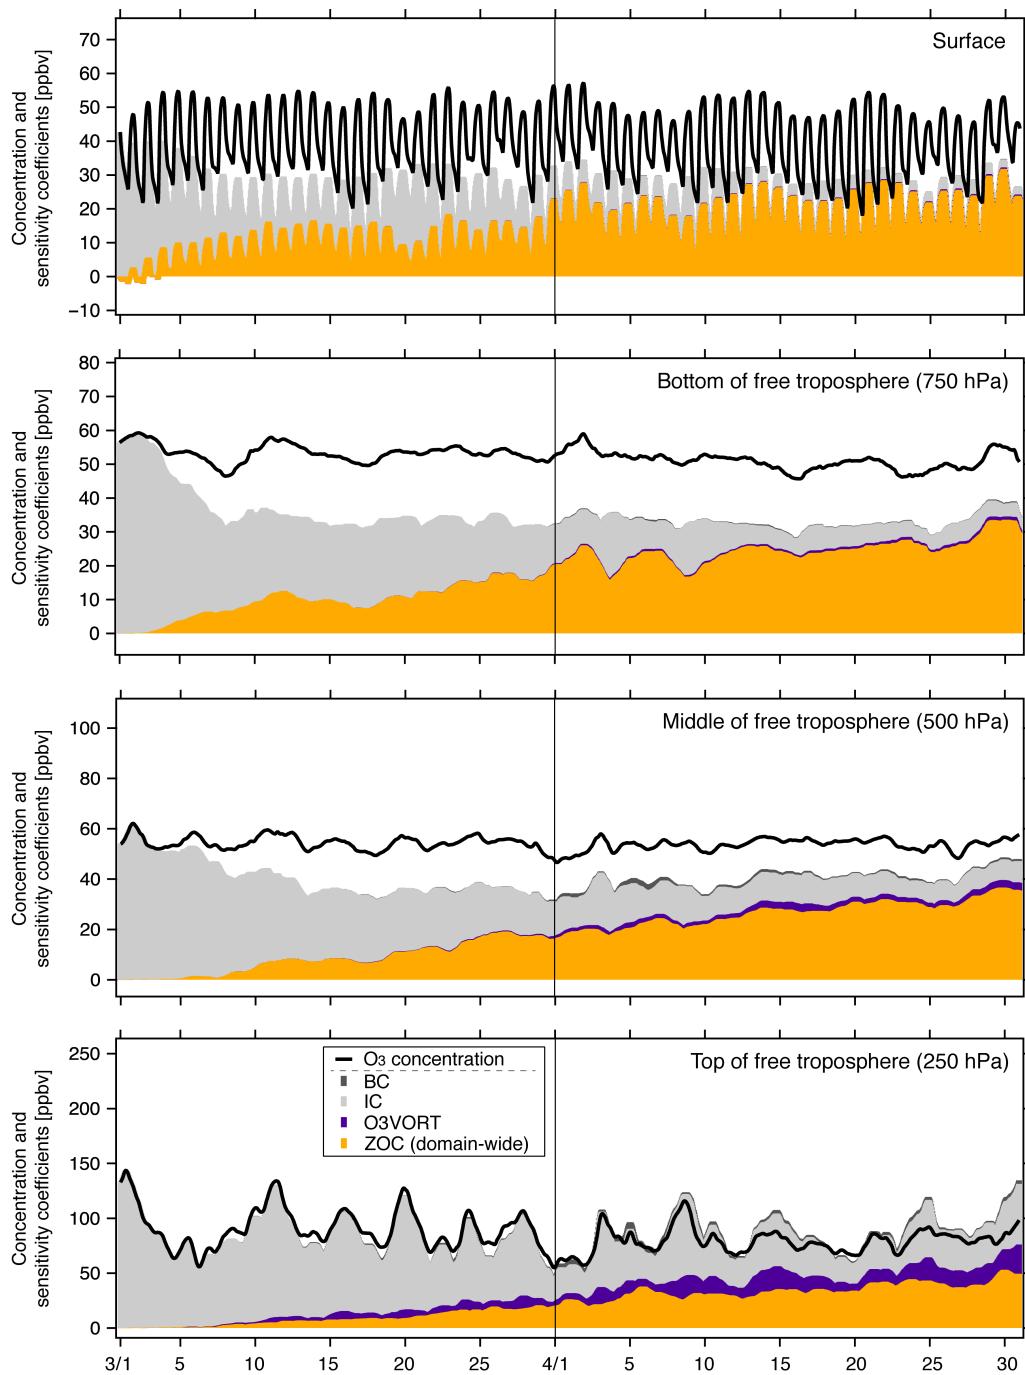

**Figure S8.** Temporal variation of O<sub>3</sub> concentration and sensitivities O<sub>3</sub> to boundary condition (BC), initial condition (IC), stratospheric O<sub>3</sub> (O<sub>3</sub>VORT), and emissions (shown as ZOC, see, eq. (5)) over CST in the U.S.A.

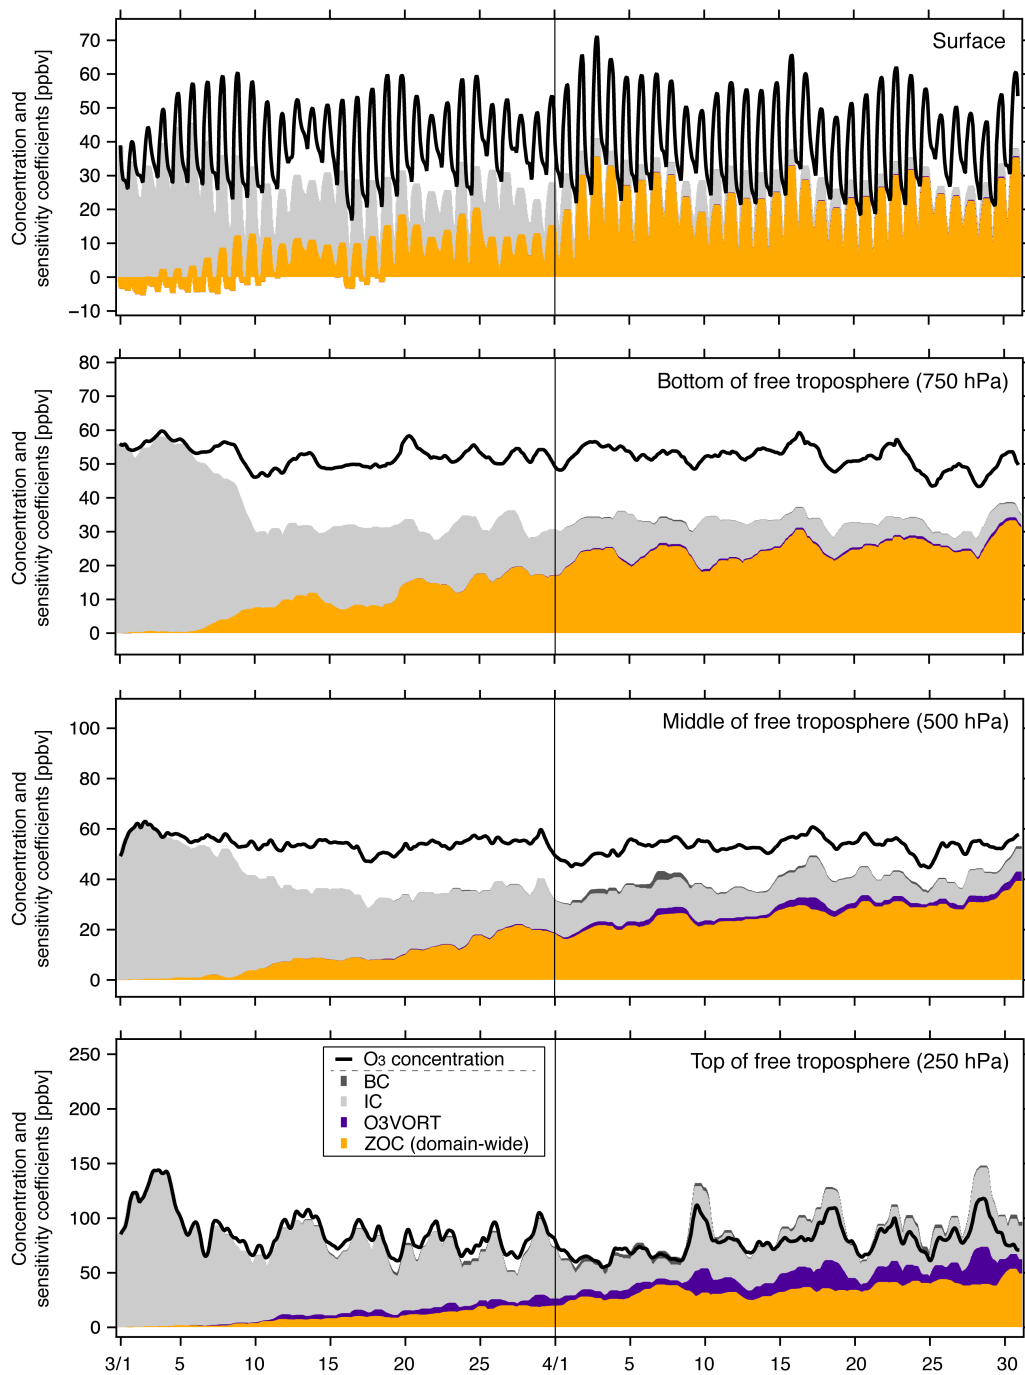

**Figure S9. Temporal variation of O<sub>3</sub> concentration and sensitivities O<sub>3</sub> to boundary condition (BC), initial condition (IC), stratospheric O<sub>3</sub> (O<sub>3</sub>VORT), and emissions (shown as ZOC, see, eq. (5)) over EST in the U.S.A.**

**Table S1. Elevated CASTNET sites in an alphabetical order.**

| ID     | Site name                    | State | Time Zone | Longitude (°) | Latitude (°) | Elevation (m a.s.l.) |
|--------|------------------------------|-------|-----------|---------------|--------------|----------------------|
| BBE401 | Big Band NP                  | TX    | CST       | -103.178      | 29.303       | 1052                 |
| CAN407 | Canyonlands NP               | UT    | MST       | -109.821      | 38.458       | 1809                 |
| CHA467 | Chiricahua NM                | AZ    | MST       | -109.389      | 32.009       | 1570                 |
| CNT169 | Centennial                   | WY    | MST       | -106.240      | 41.365       | 3175                 |
| CON186 | Converse Station             | CA    | PST       | -116.913      | 34.194       | 1718                 |
| GRB411 | Great Basin NP               | NV    | PST       | -114.216      | 39.005       | 2060                 |
| GRC474 | Grand Canyon NP              | AZ    | MST       | -112.184      | 36.059       | 2073                 |
| GTH161 | Gothic                       | CO    | MST       | -106.986      | 38.956       | 2915                 |
| JOT403 | Joshua Tree NP               | CA    | PST       | -116.389      | 34.070       | 1244                 |
| LAV410 | Lassen Volcanic NP           | CA    | PST       | -121.576      | 40.540       | 1756                 |
| MEV405 | Mesa Verde NP                | CO    | MST       | -108.490      | 37.198       | 2165                 |
| PAL190 | Palo Duro                    | TX    | CST       | -101.665      | 34.881       | 1053                 |
| PET427 | Petrified Forest             | AZ    | MST       | -109.892      | 34.823       | 1723                 |
| PND165 | Pinedake                     | WY    | MST       | -109.788      | 42.929       | 2386                 |
| PNF126 | Cranberry                    | NC    | EST       | -82.045       | 36.105       | 1216                 |
| ROM206 | Rocky Mountain NP Collocated | CO    | MST       | -105.546      | 40.278       | 2742                 |
| ROM406 | Rocky Mountain NP            | CO    | MST       | -105.546      | 40.278       | 2743                 |
| SHN418 | Shenandoah NP                | VA    | EST       | -78.435       | 38.523       | 1073                 |
| WNC429 | Wind Cave NP                 | SD    | MST       | -103.484      | 43.558       | 1292                 |
| YEL408 | Yellowstone NP               | WY    | MST       | -110.400      | 44.565       | 2430                 |
| YOS404 | Yosemite NP                  | CA    | PST       | -119.706      | 37.713       | 1605                 |

Note: Elevated sites defined as sites with an elevation higher than 1000 m a.s.l. (above sea level). The available sites during April 2010 are listed. Time zone indicates Pacific, Mountain, Central, and Eastern Standard Time as PST, MST, CST, and EST.
